# Supplementary material for: Nucleus-targeted Dmp1 transgene fails to rescue dental defects in Dmp1 null mice
Source: PubMed Central journal article supplement — Int J Oral Sci. 2014 Aug 8;6(3):133–41. doi: 10.1038/ijos.2014.44 (PMC4170153; doi:10.1038/ijos.2014.44), 2014-08-08
Supplement: ijos201444x1.pdf [file ijos201444x1.pdf]

Supplementary Figure

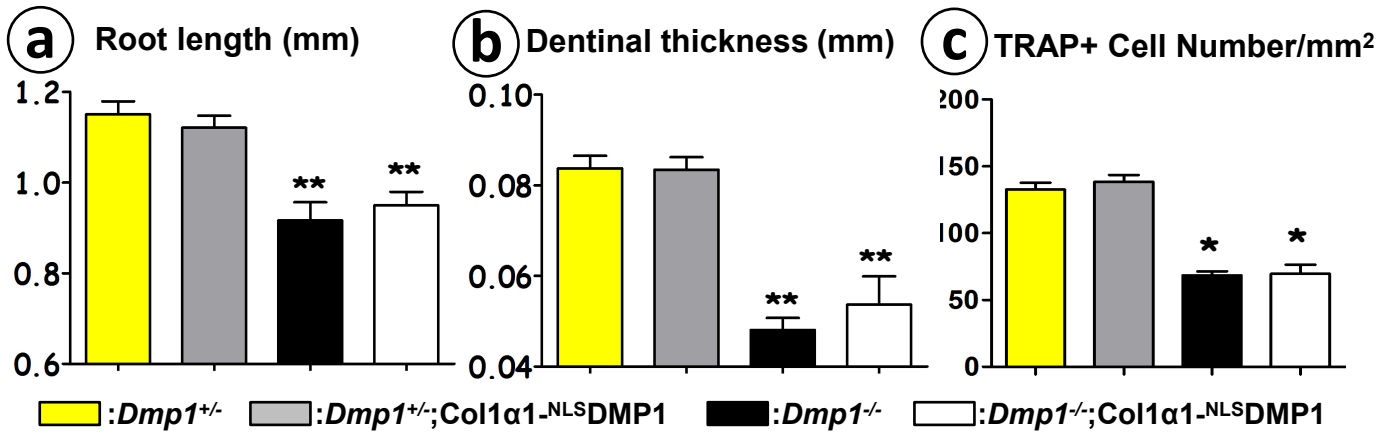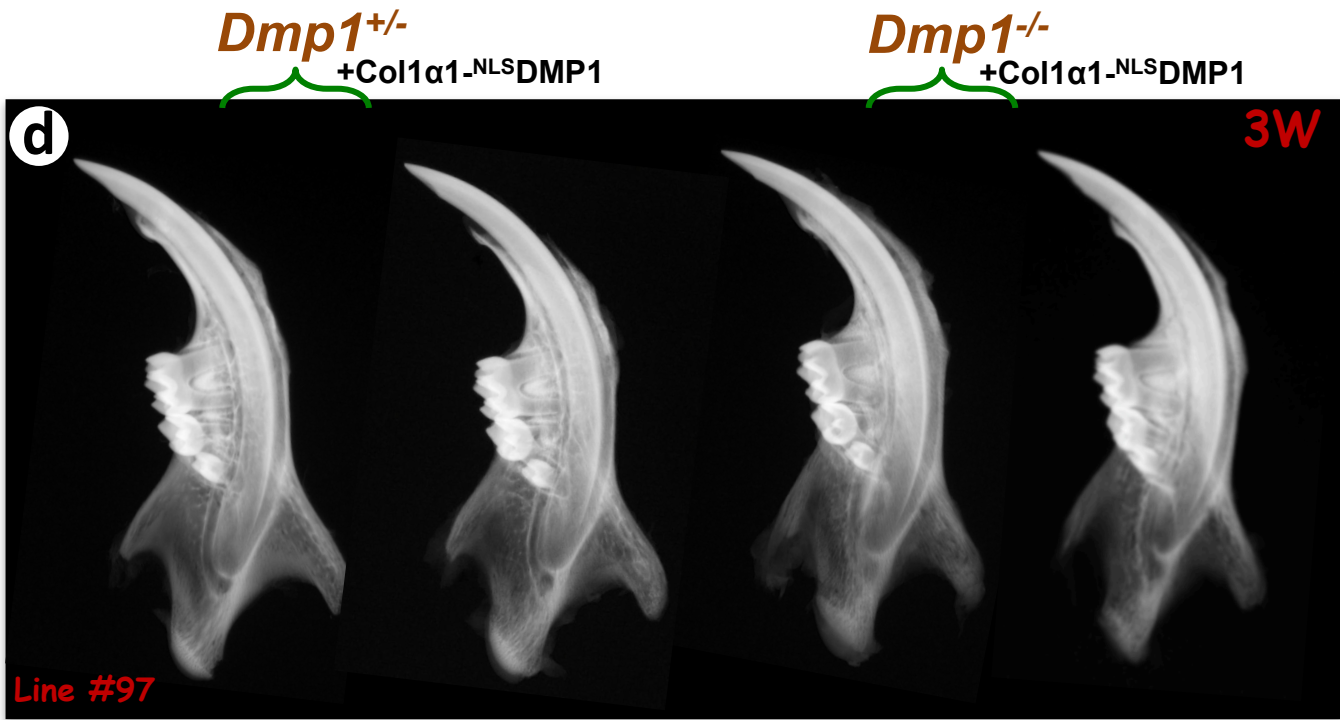

**Supplementary Figure** (a-b) Shown are the length (mm) of the roots (a) and the thickness (mm) of the dentin layer (b) from 3-week-old mice. Data are mean ± SEM; n=6 in each group; \*P<0.05; \*\*P<0.01, compared to the control (HET). (c) Statistical analysis of the number of osteoclasts in 3-week-old mice. Data are mean ± SEM; n=4 in each group; \*P<0.05, compared to the control. (d) Radiographs of the 3-week-old mandibles of another independent line (line #97). Typical dental and condylar defects can be found in the *Dmp1*<sup>-/-</sup> and *Dmp1*<sup>-/-</sup>; Col1α1-NLSDMP1 mice.
